# Supplementary figures and images for: Supervised classification of human microbiota
Source: Oxford University Press journal article supplement (doi:10.1111/j.1574-6976.2010.00251.x), 2010-09-21

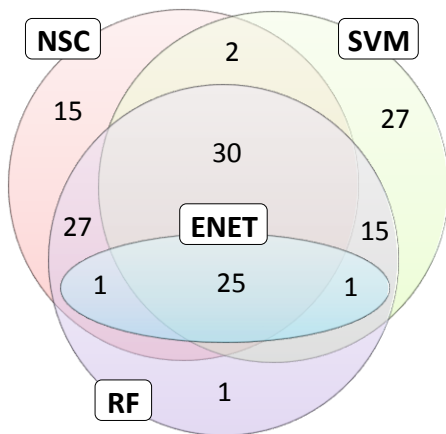

Supplement: Supp_Figure_1_Venn_diagram.pdf [file Supp_Figure_1_Venn_diagram.pdf]
